# Supplementary material
Source: publisher figshare collection journal article supplement (https://aacr.figshare.com/ndownloader/files/41584780)
Supplement: Supplementary file [file 41584780]

Supplementary Figure 5

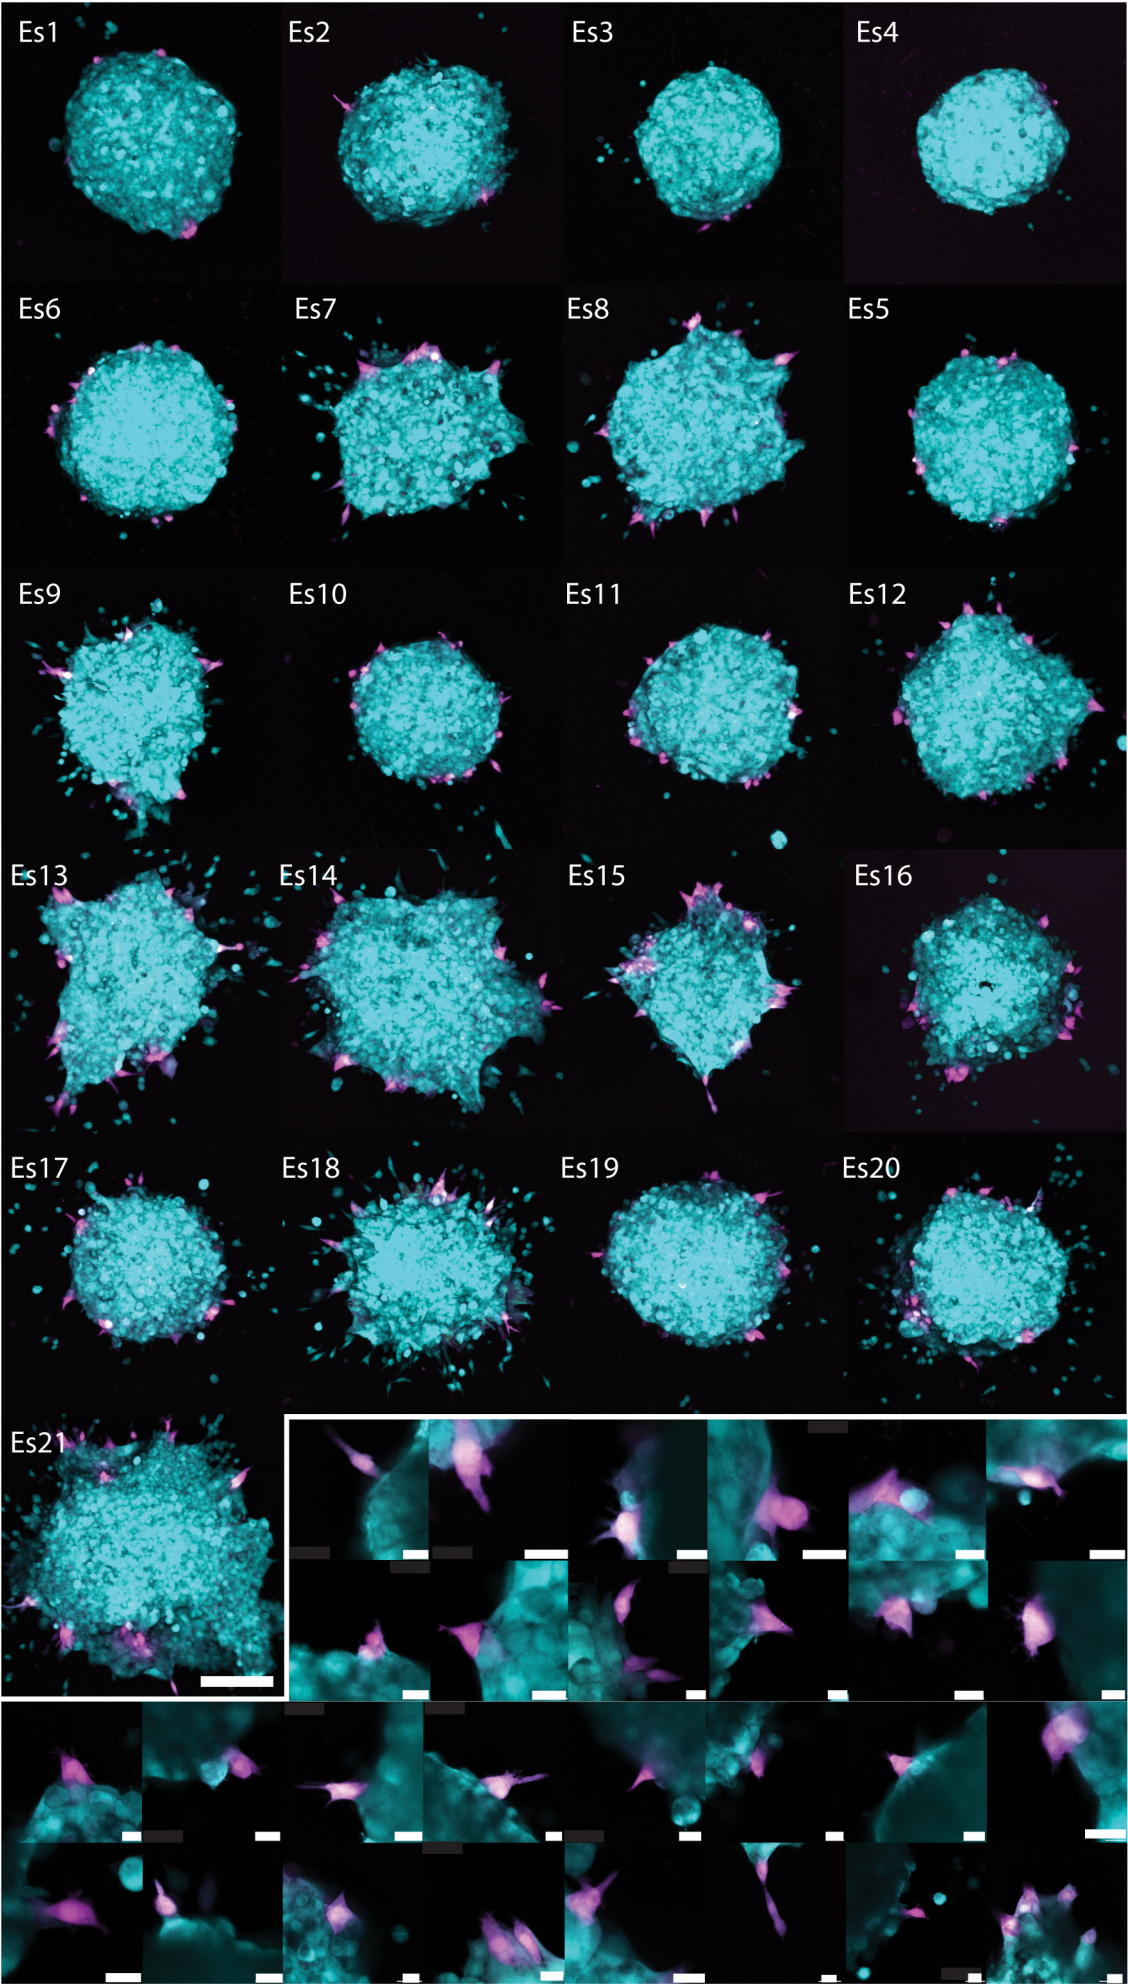

**Supplementary Figure 5 | Escaping cell cohort gallery.** Invasive escaping cells still attached to the spheroid were photoconverted from a total of 21 spheroid samples. Photoconverted cells are shown in magenta. Scale bar 200  $\mu\text{m}$  for whole field of view images, 20  $\mu\text{m}$  for close-ups.
